# Supplementary material for: Joint Transcriptomic and Metabolomic Analyses Reveal Changes in the Primary Metabolism and Imbalances in the Subgenome Orchestration in the Bread Wheat Molecular Response to Fusarium graminearum
Source: PubMed Central journal article supplement (PMC4683631; doi:10.1534/g3.115.021550), 2015-10-04
Supplement: supp_g3.115.021550_FigureS2.pdf [file supp_g3.115.021550_FigureS2.pdf]

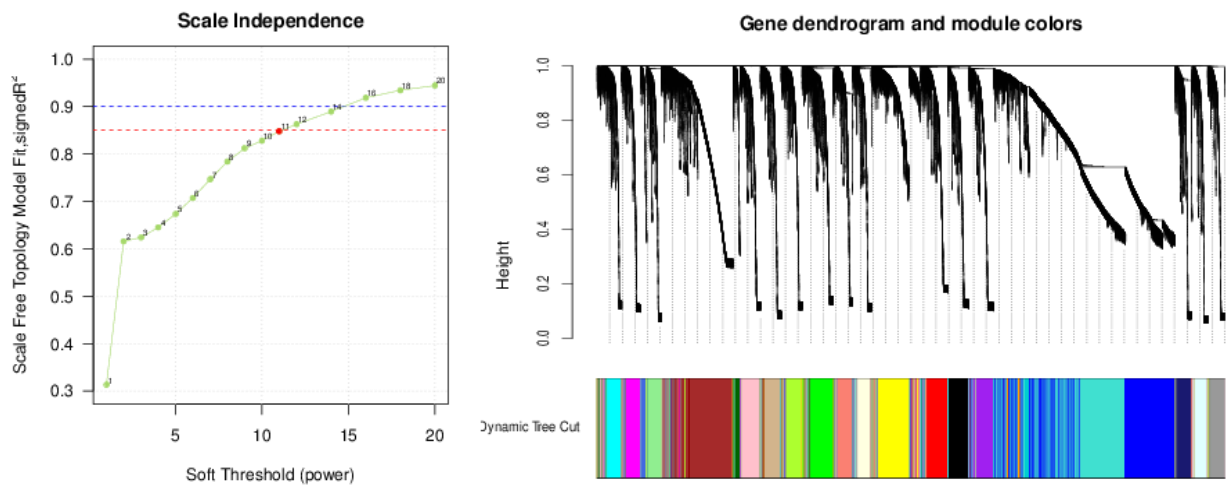

**Supplemental Figure 1**- Picking of a soft-thresholding power beta and analysis of scale-free topology. Clustering based on the Topological Overlap Matrix.

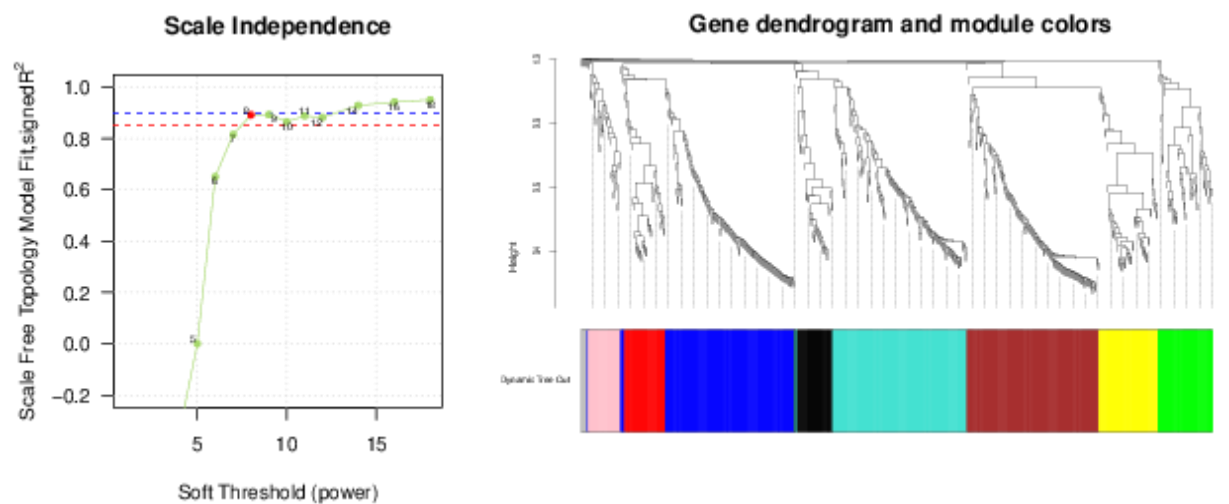

**Supplemental Figure 2** - Picking of a soft-thresholding power beta and analysis of scale-free topology for the triplet network. Clustering based on the Topological Overlap Matrix.
