# Supplementary material for: Joint Transcriptomic and Metabolomic Analyses Reveal Changes in the Primary Metabolism and Imbalances in the Subgenome Orchestration in the Bread Wheat Molecular Response to Fusarium graminearum
Source: PubMed Central journal article supplement (PMC4683631; doi:10.1534/g3.115.021550), 2015-10-04
Supplement: supp_g3.115.021550_FigureS3.pdf [file supp_g3.115.021550_FigureS3.pdf]

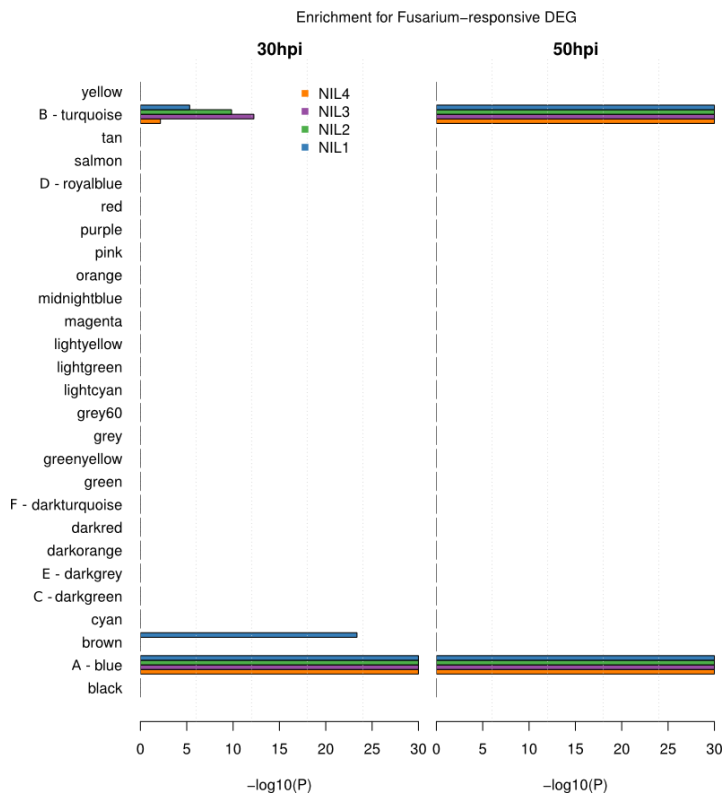

**Supplemental Figure 3** - Enrichment for differentially expressed genes within the co-expression modules. FDR adjusted P values from a one-sided Fisher's exact test. For readability the bars were truncated at 10-30. Color names refer to the original WGCNA module labeling.
