# Supplementary material for: Joint Transcriptomic and Metabolomic Analyses Reveal Changes in the Primary Metabolism and Imbalances in the Subgenome Orchestration in the Bread Wheat Molecular Response to Fusarium graminearum
Source: PubMed Central journal article supplement (PMC4683631; doi:10.1534/g3.115.021550), 2015-10-04
Supplement: supp_g3.115.021550_FigureS6.pdf [file supp_g3.115.021550_FigureS6.pdf]

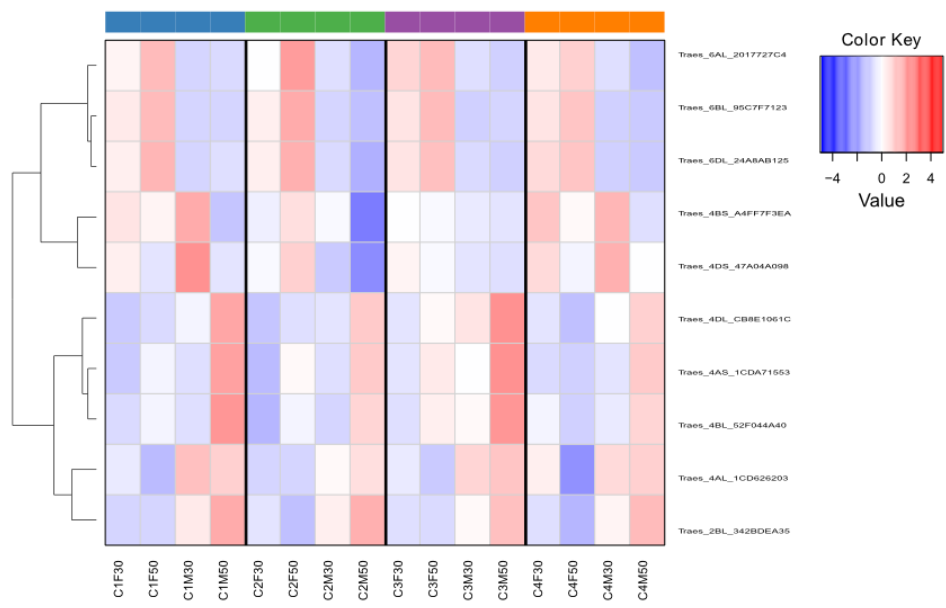

**Supplemental Figure 6** - Expression of Glutamine synthetase genes. Genes were derived by homology to *A thaliana* genes.
