# Supplementary material for: Joint Transcriptomic and Metabolomic Analyses Reveal Changes in the Primary Metabolism and Imbalances in the Subgenome Orchestration in the Bread Wheat Molecular Response to Fusarium graminearum
Source: PubMed Central journal article supplement (PMC4683631; doi:10.1534/g3.115.021550), 2015-10-04
Supplement: supp_g3.115.021550_FigureS7.pdf [file supp_g3.115.021550_FigureS7.pdf]

### Module D - Royalblue

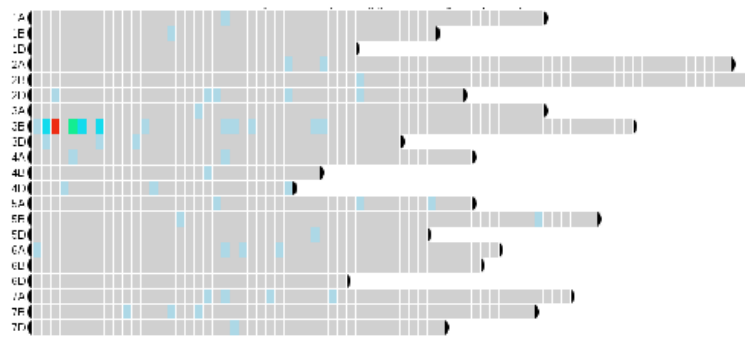

### Chromosome(-arm) enrichment

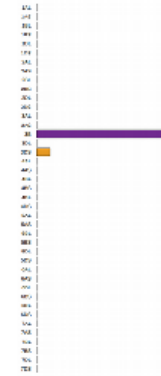

### Module C - Darkgreen

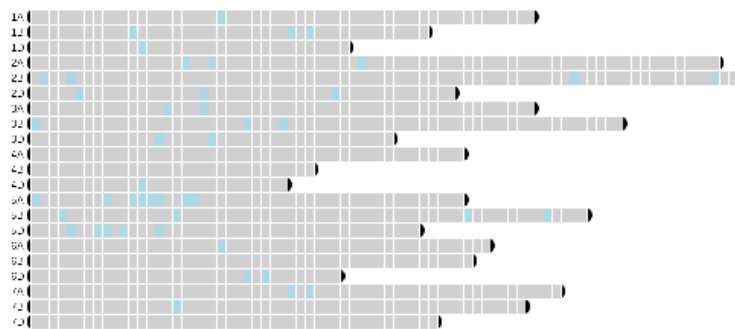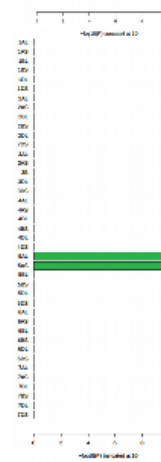

**Supplemental Figure 7** - Visualization of the chromosomal positioning of the modules D (royalblue) and C (darkgreen) and the corresponding chromosome-arm enrichment with chromoWIZ (<http://pgsb.helmholtz-muenchen.de/plant/chromoWIZ/>). Color names refer to original WGCNA module names.
