# Supplementary material for: Joint Transcriptomic and Metabolomic Analyses Reveal Changes in the Primary Metabolism and Imbalances in the Subgenome Orchestration in the Bread Wheat Molecular Response to Fusarium graminearum
Source: PubMed Central journal article supplement (PMC4683631; doi:10.1534/g3.115.021550), 2015-10-04
Supplement: supp_g3.115.021550_FigureS10.pdf [file supp_g3.115.021550_FigureS10.pdf]

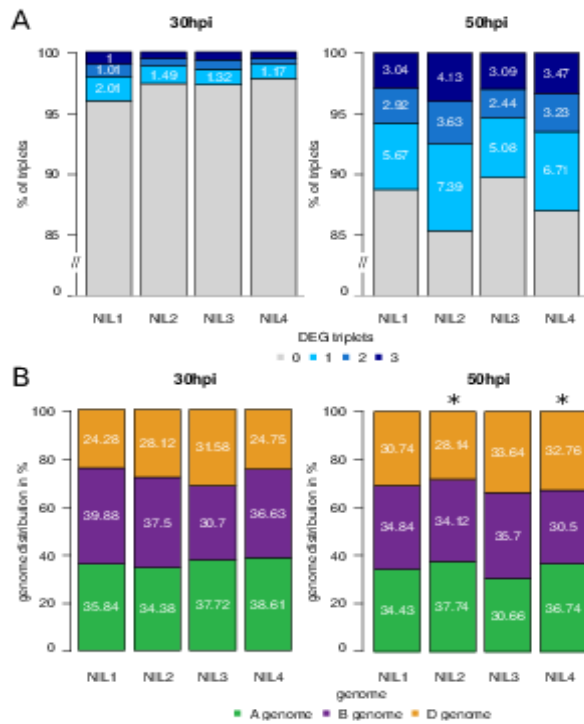

**Supplemental Figure 10** - Analysis of triplet expression. (A) Ratio of differential expressed triplet members. (B) Subgenome distribution of triplets with only one members showing differential expression after treatment with *Fusarium graminearum*. Significance of deviations from the expected distributions was quantified by a chi-squared test against 10,000 random multinomial distributions following the expected A, B, D subgenome distribution from the bread wheat high confidence gene set (\* FDR adjusted  $P < 0.05$ ).
