# Supplementary material for: Joint Transcriptomic and Metabolomic Analyses Reveal Changes in the Primary Metabolism and Imbalances in the Subgenome Orchestration in the Bread Wheat Molecular Response to Fusarium graminearum
Source: PubMed Central journal article supplement (PMC4683631; doi:10.1534/g3.115.021550), 2015-10-04
Supplement: supp_g3.115.021550_FigureS12.pdf [file supp_g3.115.021550_FigureS12.pdf]

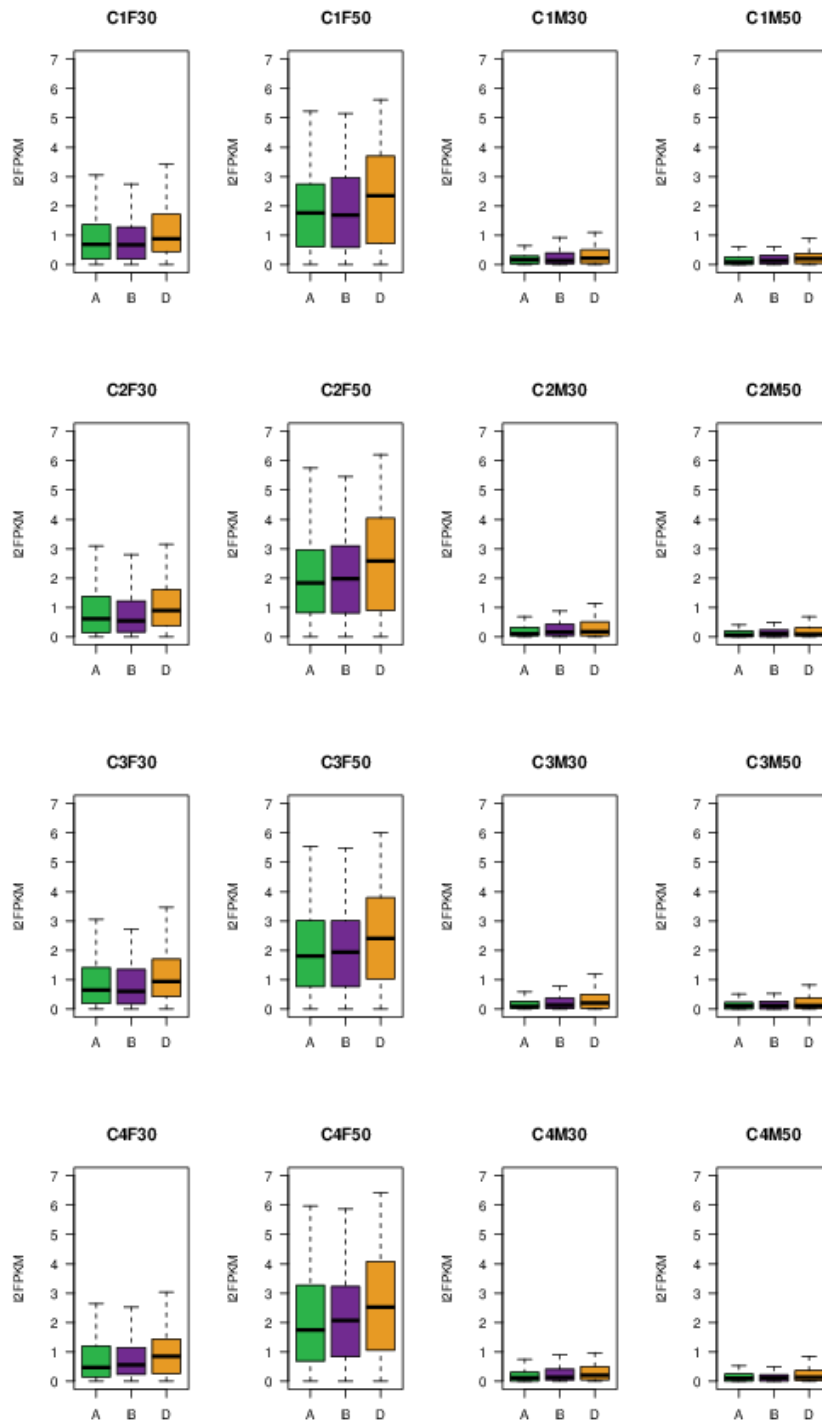

**Supplemental Figure 12** – Condition-wise expression patterns for each of the four genotypes in the ‘green’ triplet network module. (F: *Fusarium graminearum* treatment; M: mock treatment; 30: 30hpi; 50: 50hpi)
