# Supplementary material for: Joint Transcriptomic and Metabolomic Analyses Reveal Changes in the Primary Metabolism and Imbalances in the Subgenome Orchestration in the Bread Wheat Molecular Response to Fusarium graminearum
Source: PubMed Central journal article supplement (PMC4683631; doi:10.1534/g3.115.021550), 2015-10-04
Supplement: supp_g3.115.021550_FigureS13.pdf [file supp_g3.115.021550_FigureS13.pdf]

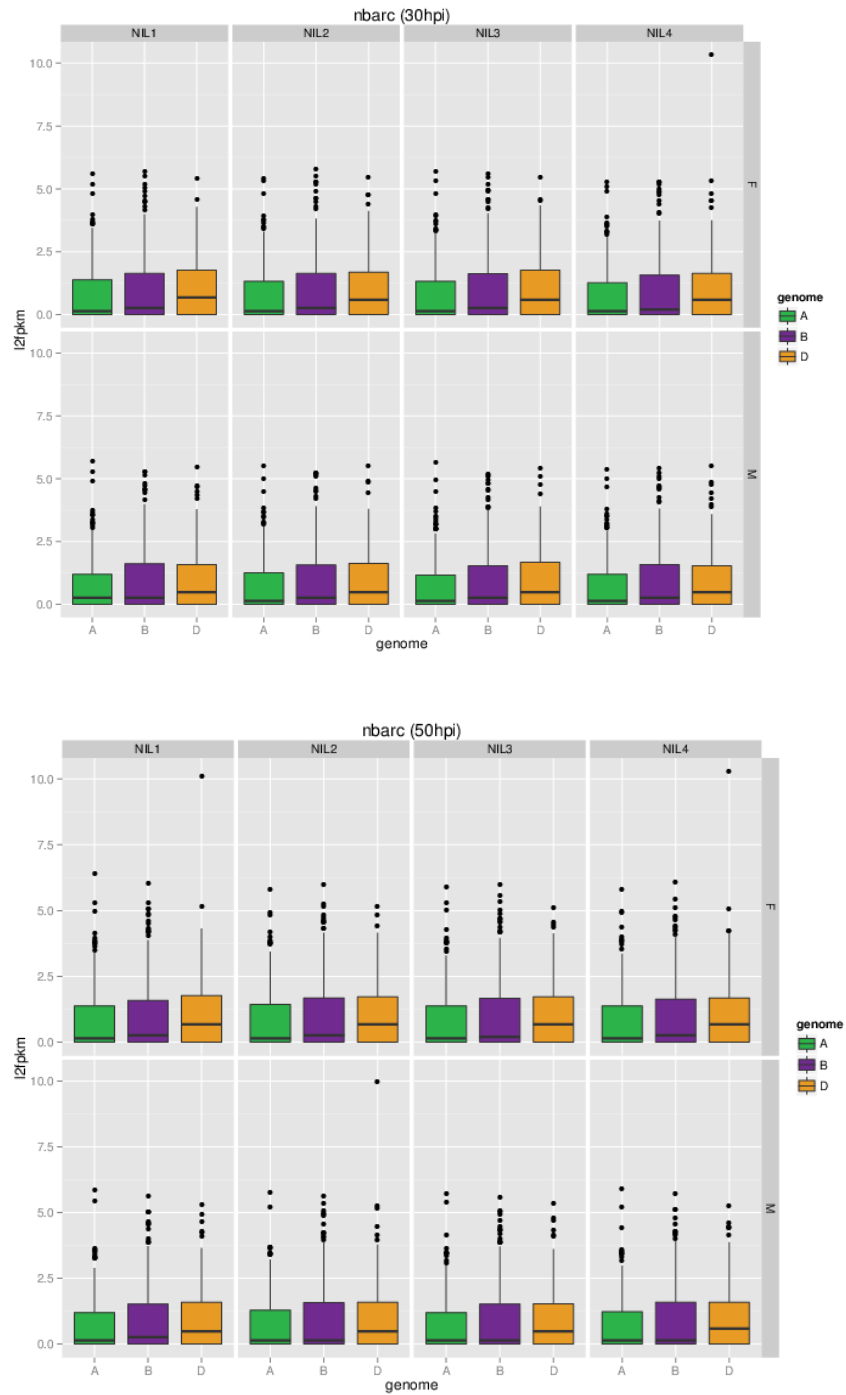

**Supplemental Figure 13** – Expression of NB-ARC domain containing genes. Genes were extracted based on the NB-ARC Interpro domain (IPR002182; <http://www.ebi.ac.uk/interpro/entry/IPR002182>).
