# Supplementary material for: Joint Transcriptomic and Metabolomic Analyses Reveal Changes in the Primary Metabolism and Imbalances in the Subgenome Orchestration in the Bread Wheat Molecular Response to Fusarium graminearum
Source: PubMed Central journal article supplement (PMC4683631; doi:10.1534/g3.115.021550), 2015-10-04
Supplement: supp_g3.115.021550_FigureS14.pdf [file supp_g3.115.021550_FigureS14.pdf]

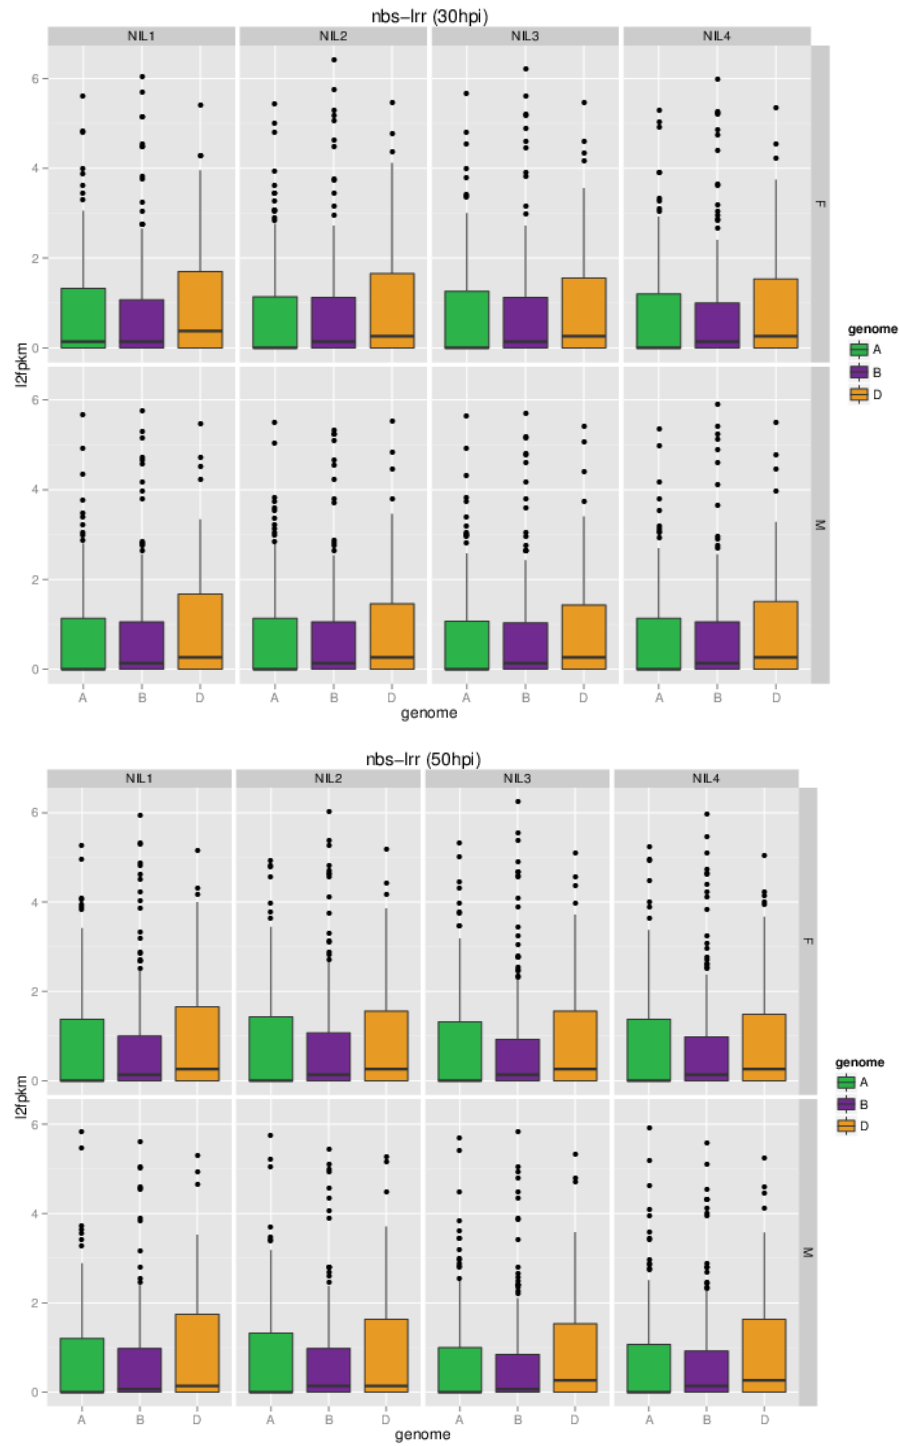

**Supplemental Figure 14** - Expression of NBS-LRR genes. Genes were extracted by searching for the term “NBS-LRR” in the IWGSC bread wheat genome annotation AHRD.
