# Supplementary material for: Joint Transcriptomic and Metabolomic Analyses Reveal Changes in the Primary Metabolism and Imbalances in the Subgenome Orchestration in the Bread Wheat Molecular Response to Fusarium graminearum
Source: G3 (Bethesda). 2015 Oct 4;5(12):2579–92. doi: 10.1534/g3.115.021550 (PMC4683631; doi:10.1534/g3.115.021550)
Supplement: Supporting Information [file supp_g3.115.021550_021550SI.pdf]

**Joint transcriptomic and metabolomic analyses reveal changes in the primary metabolism and imbalances in the subgenome orchestration in the bread wheat molecular response to *Fusarium graminearum***

Thomas Nussbaumer<sup>1\*</sup>, Benedikt Warth<sup>2†</sup>, Sapna Sharma<sup>\*</sup>, Christian Ametz<sup>§</sup>, Christoph Bueschl<sup>†</sup>, Alexandra Parich<sup>†</sup>, Matthias Pfeifer<sup>\*</sup>, Gerald Siegwart<sup>§</sup>, Barbara Steiner<sup>§</sup>, Marc Lemmens<sup>§</sup>, Rainer Schuhmacher<sup>†</sup>, Hermann Buerstmayr<sup>§</sup>, Klaus F.X. Mayer<sup>\*</sup>, Karl G. Kugler<sup>\*</sup>, Wolfgang Schweiger<sup>§3</sup>

<sup>\*</sup>Plant Genome and Systems Biology, Helmholtz Zentrum München, Neuherberg, D-85764, Germany

<sup>§</sup>Institute for Biotechnology in Plant Production (IFA-Tulln), BOKU - University of Natural Resources and Life Sciences, Tulln, A-3430, Austria

<sup>†</sup>Center for Analytical Chemistry (IFA-Tulln), BOKU - University of Natural Resources and Life Sciences, Tulln, A- 3430, Austria

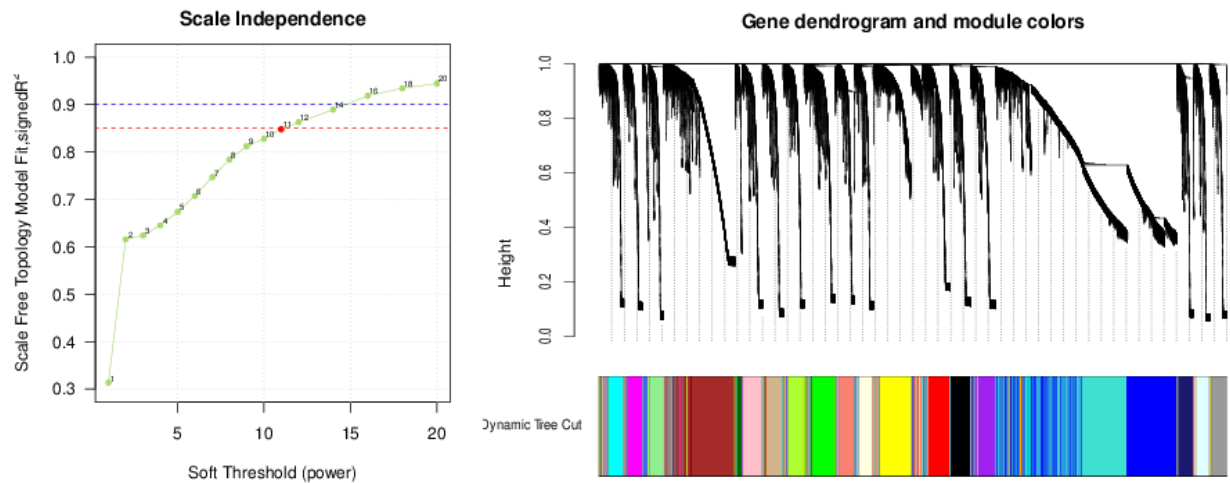

**Supplemental Figure 1**- Picking of a soft-thresholding power beta and analysis of scale-free topology. Clustering based on the Topological Overlap Matrix.

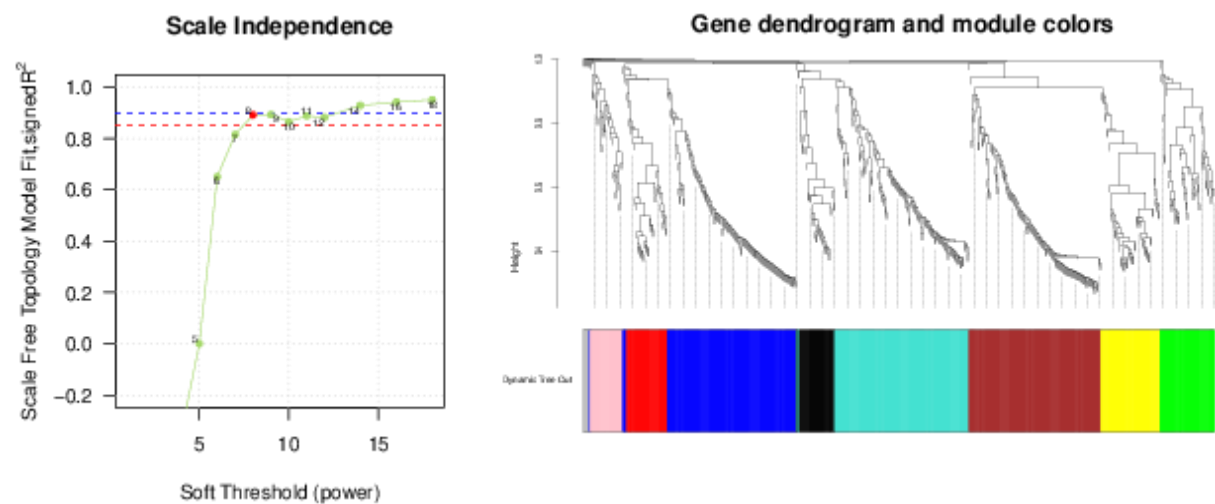

**Supplemental Figure 2** - Picking of a soft-thresholding power beta and analysis of scale-free topology for the triplet network. Clustering based on the Topological Overlap Matrix.

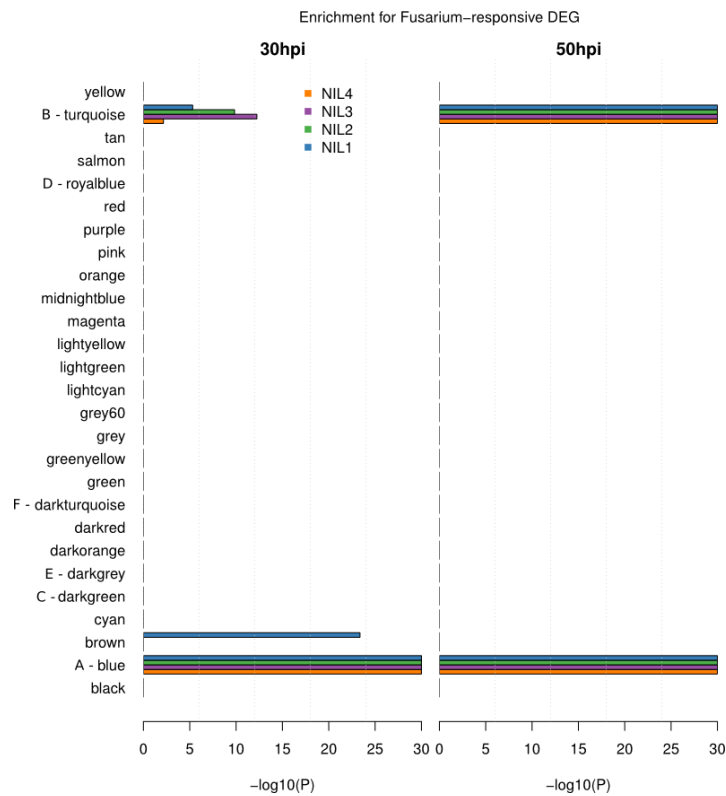

**Supplemental Figure 3** - Enrichment for differentially expressed genes within the co-expression modules. FDR adjusted P values from a one-sided Fisher's exact test. For readability the bars were truncated at 10-30. Color names refer to the original WGCNA module labeling.

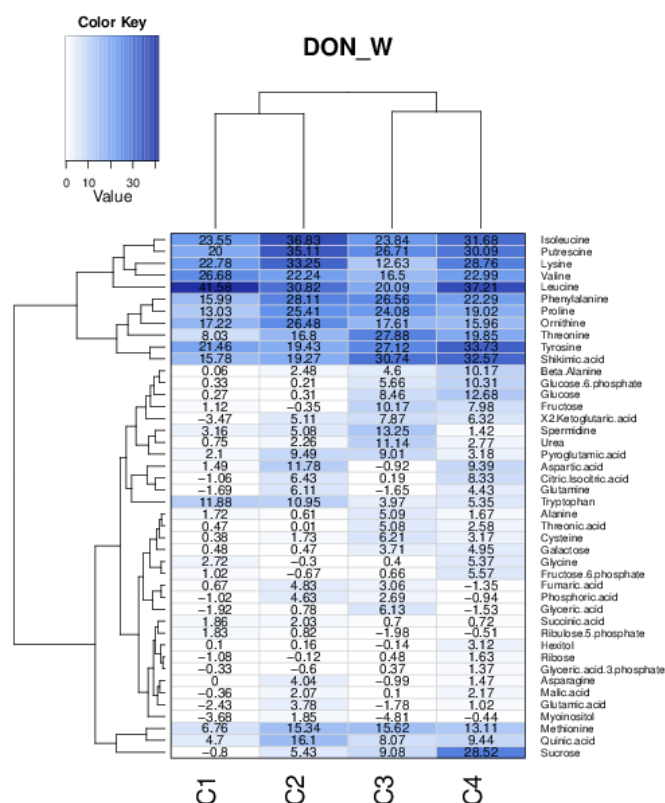

**Supplemental Figure 4** - Scoring of the differences in treatment for the comparison between DON and water treatment on the metabolomics data.

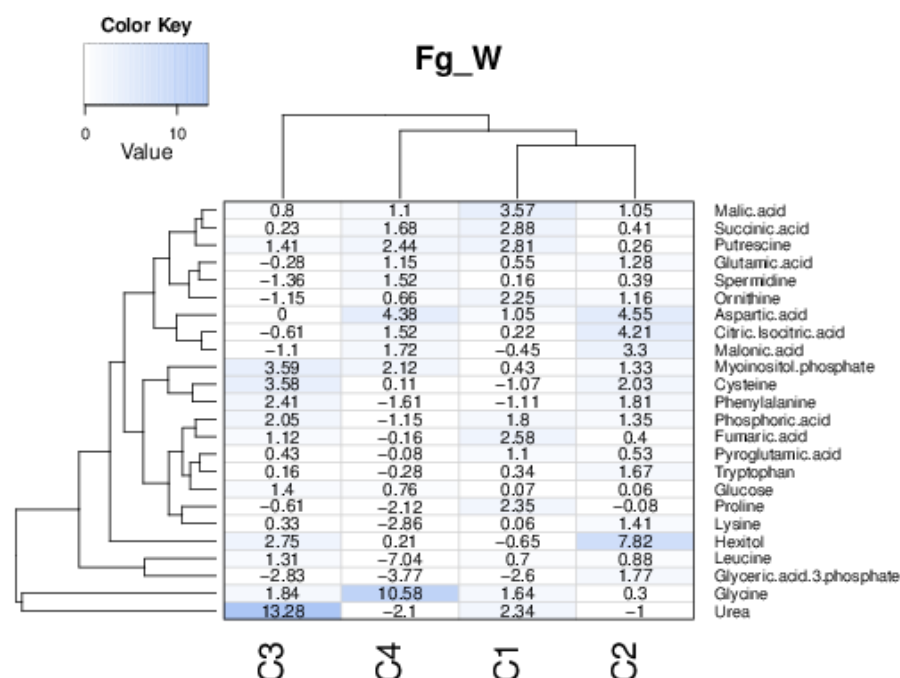

**Supplemental Figure 5** - Scoring of the differences in treatment for the comparison between *Fusarium graminearum* and water treatment on the metabolomics data.

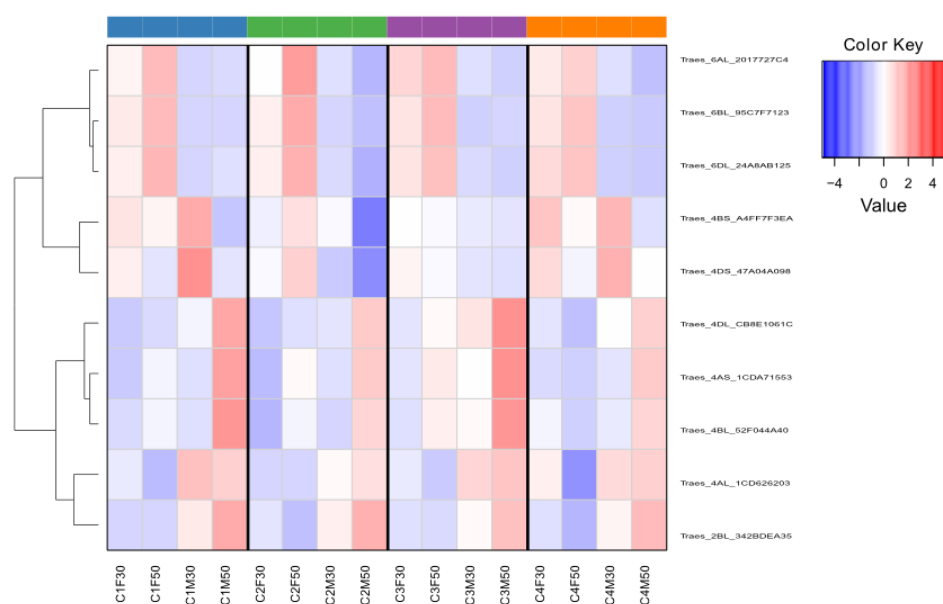

**Supplemental Figure 6** - Expression of Glutamine synthetase genes. Genes were derived by homology to *A. thaliana* genes.

### Module D - Royalblue

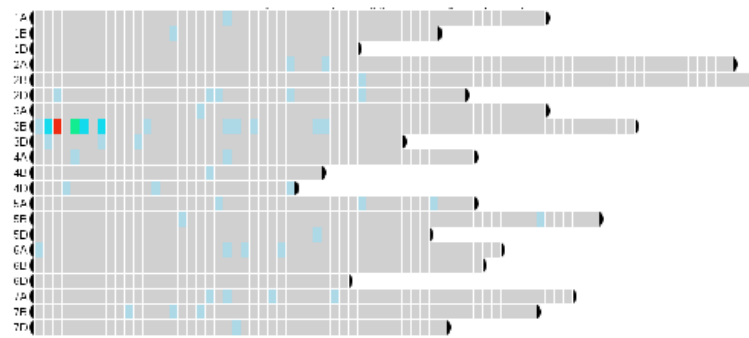

### Chromosome(-arm) enrichment

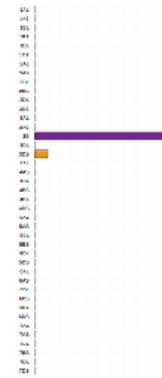

### Module C - Darkgreen

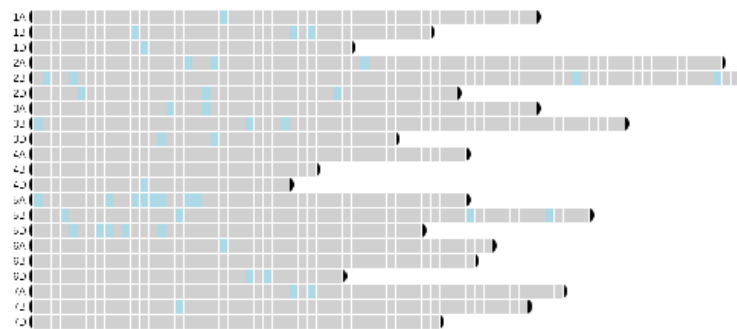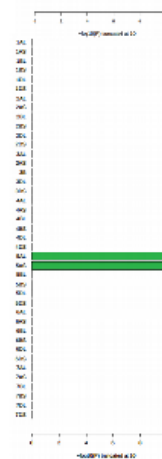

**Supplemental Figure 7** - Visualization of the chromosomal positioning of the modules D (royalblue) and C (darkgreen) and the corresponding chromosome-arm enrichment with chromoWIZ (<http://pgsb.helmholtz-muenchen.de/plant/chromoWIZ/>). Color names refer to original WGCNA module names.

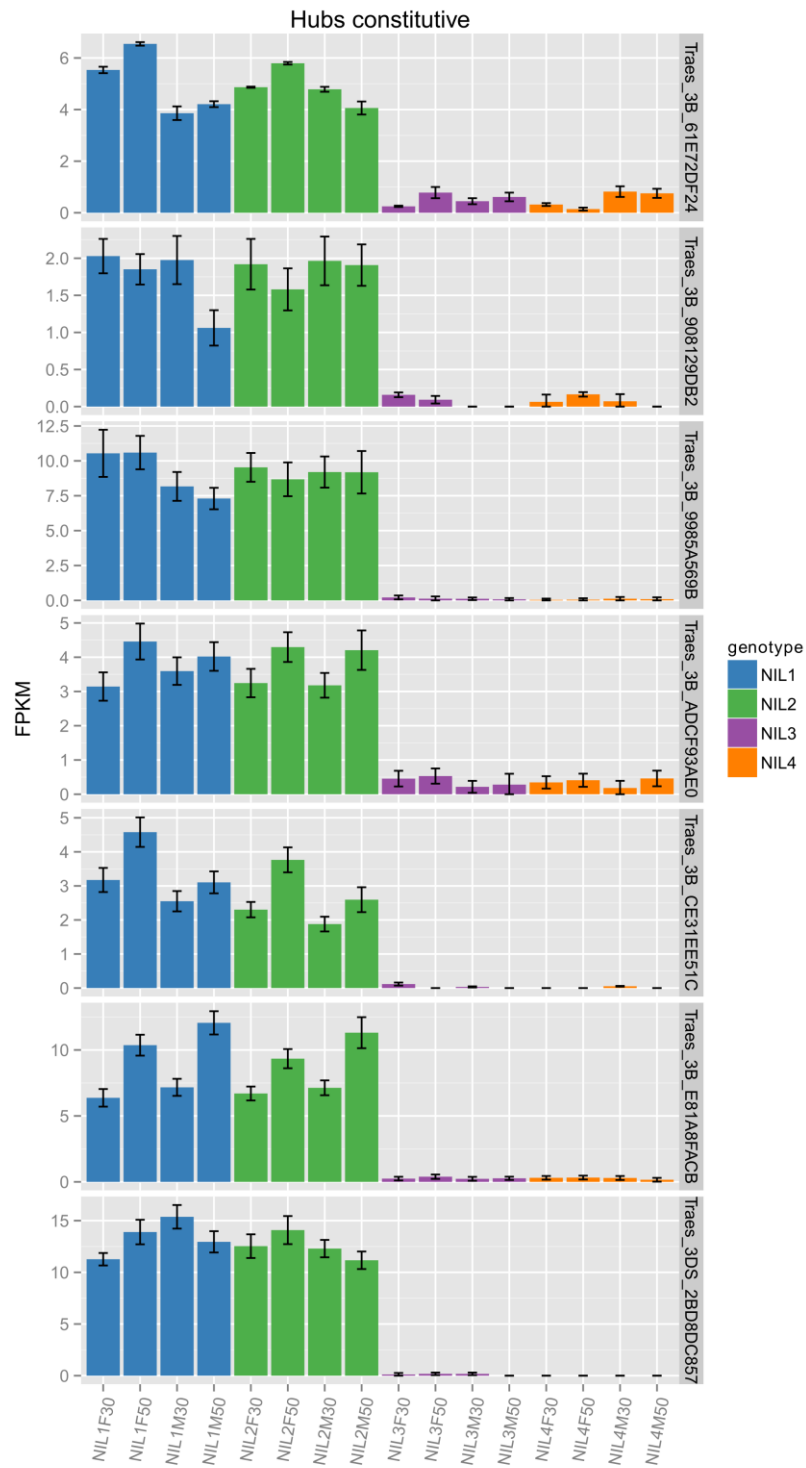

**Supplemental Figure 8** - Constitutive expression of hub genes on 3B and 3D.

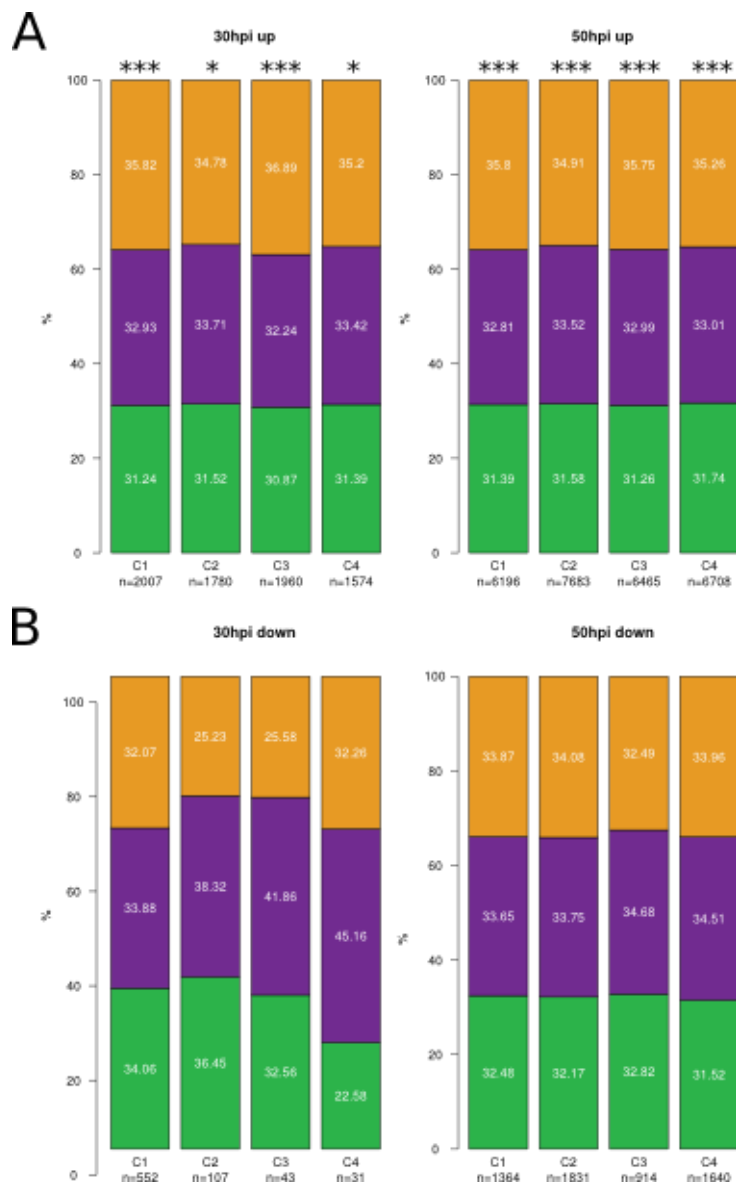

**Supplemental Figure 9** - Subgenome-wise contribution to differentially expressed genes. (A) Genes that show increased expression after *Fusarium graminearum* treatment. (B) Genes that show reduced expression after *Fusarium graminearum* treatment. Significance of deviations from the expected distributions was quantified by a chi-squared test against 10,000 random multinomial distributions following the expected A, B, D subgenome distribution from the bread wheat high confidence gene set (\* FDR adjusted  $P < 0.05$ ; \*\*\* FDR adjusted  $P < 0.001$ ). The number of genes with significant changes in expression levels is given as 'n'.

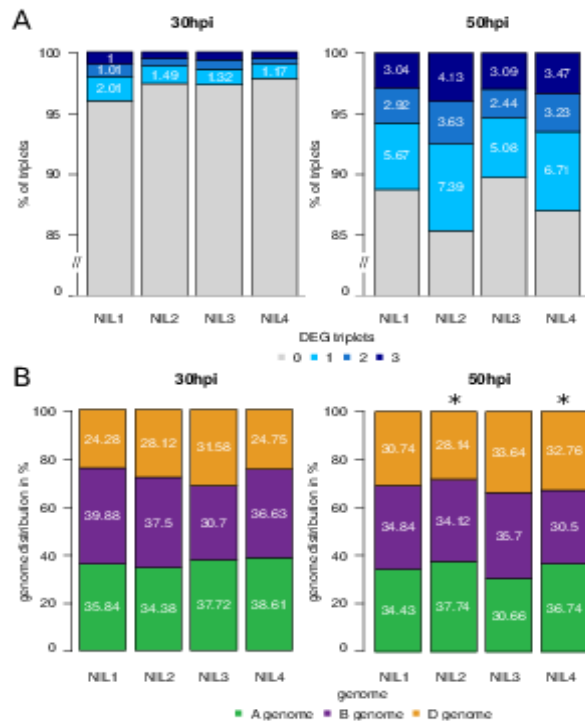

**Supplemental Figure 10** - Analysis of triplet expression. (A) Ratio of differential expressed triplet members. (B) Subgenome distribution of triplets with only one members showing differential expression after treatment with *Fusarium graminearum*. Significance of deviations from the expected distributions was quantified by a chi-squared test against 10,000 random multinomial distributions following the expected A, B, D subgenome distribution from the bread wheat high confidence gene set (\* FDR adjusted  $P < 0.05$ ).

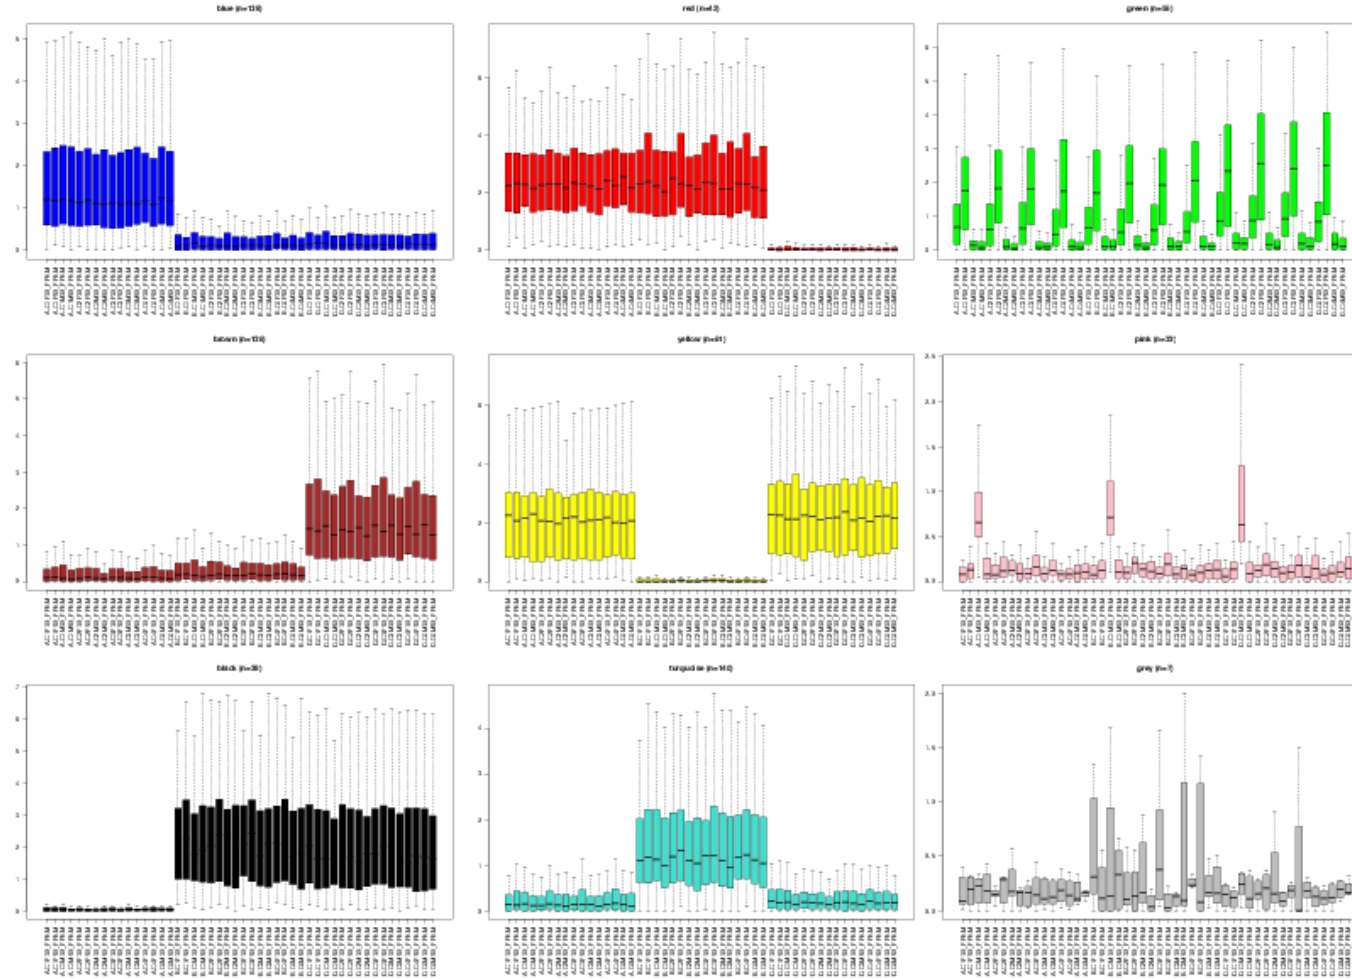

**Supplemental Figure 11** - Module-wise expression in the triplet network. The first letter in the names on the x-axis indicates the subgenome (A, B, or D).

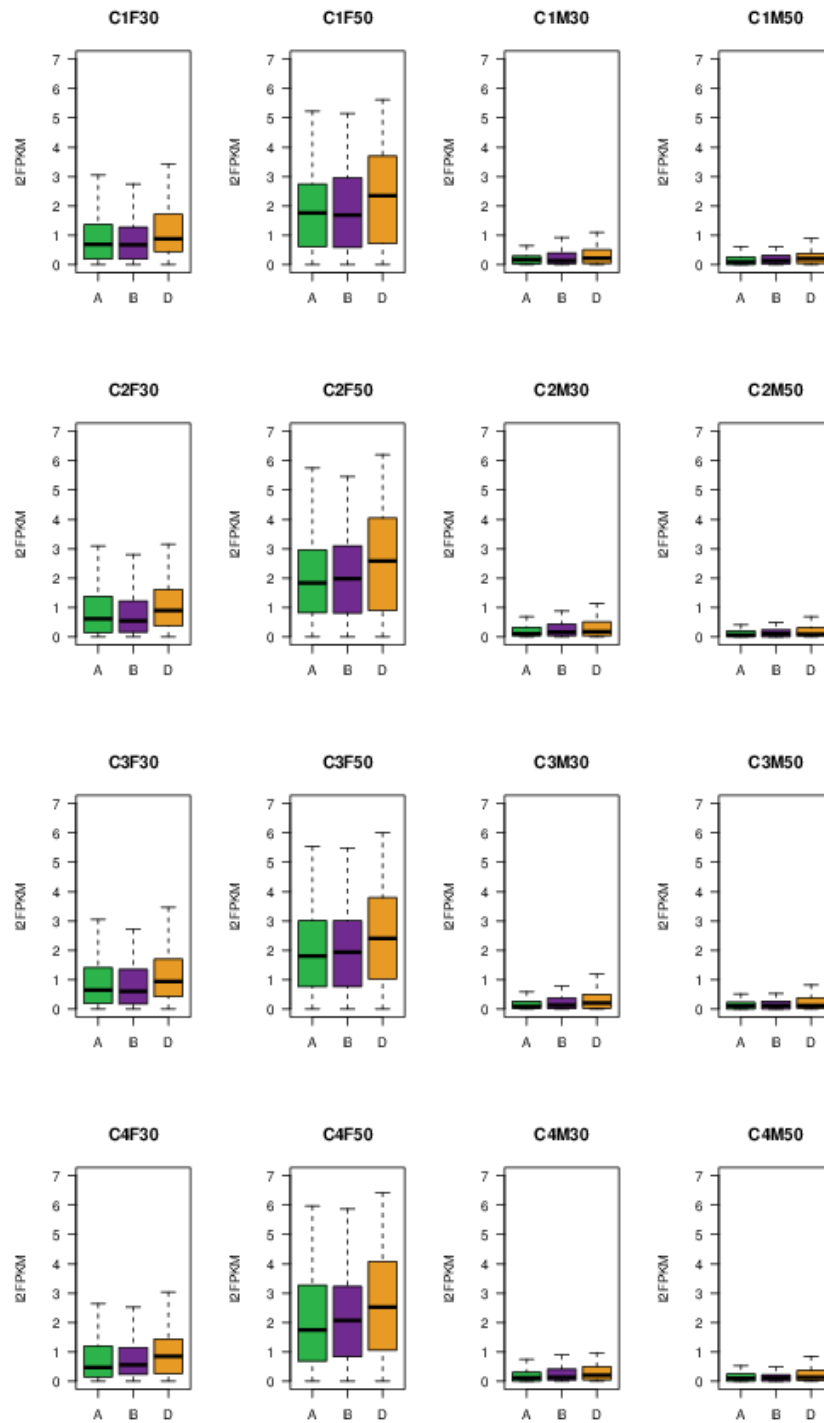

**Supplemental Figure 12** – Condition-wise expression patterns for each of the four genotypes in the ‘green’ triplet network module. (F: *Fusarium graminearum* treatment; M: mock treatment; 30: 30hpi; 50: 50hpi)

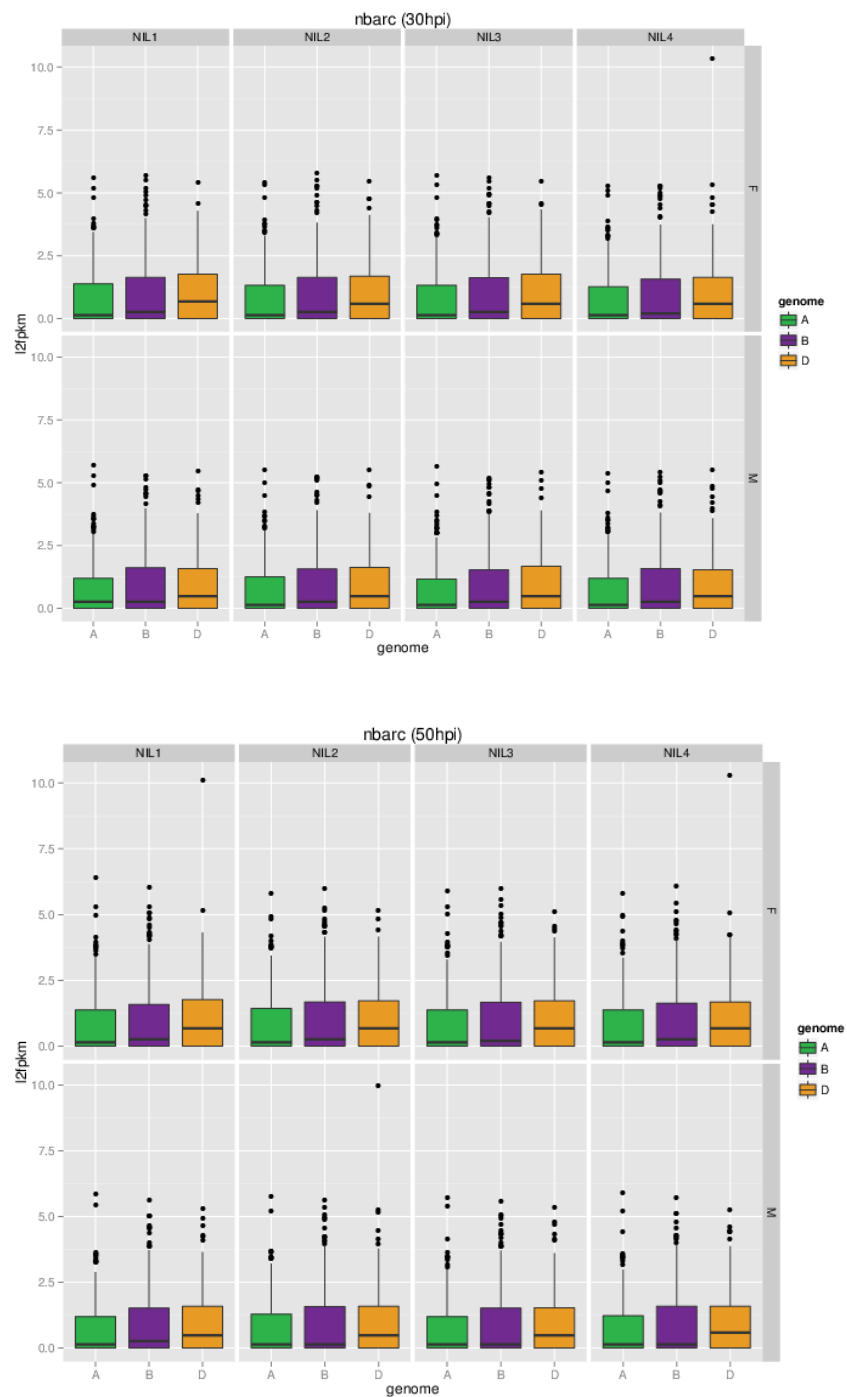

**Supplemental Figure 13** – Expression of NB-ARC domain containing genes. Genes were extracted based on the NB-ARC Interpro domain (IPR002182; <http://www.ebi.ac.uk/interpro/entry/IPR002182>).

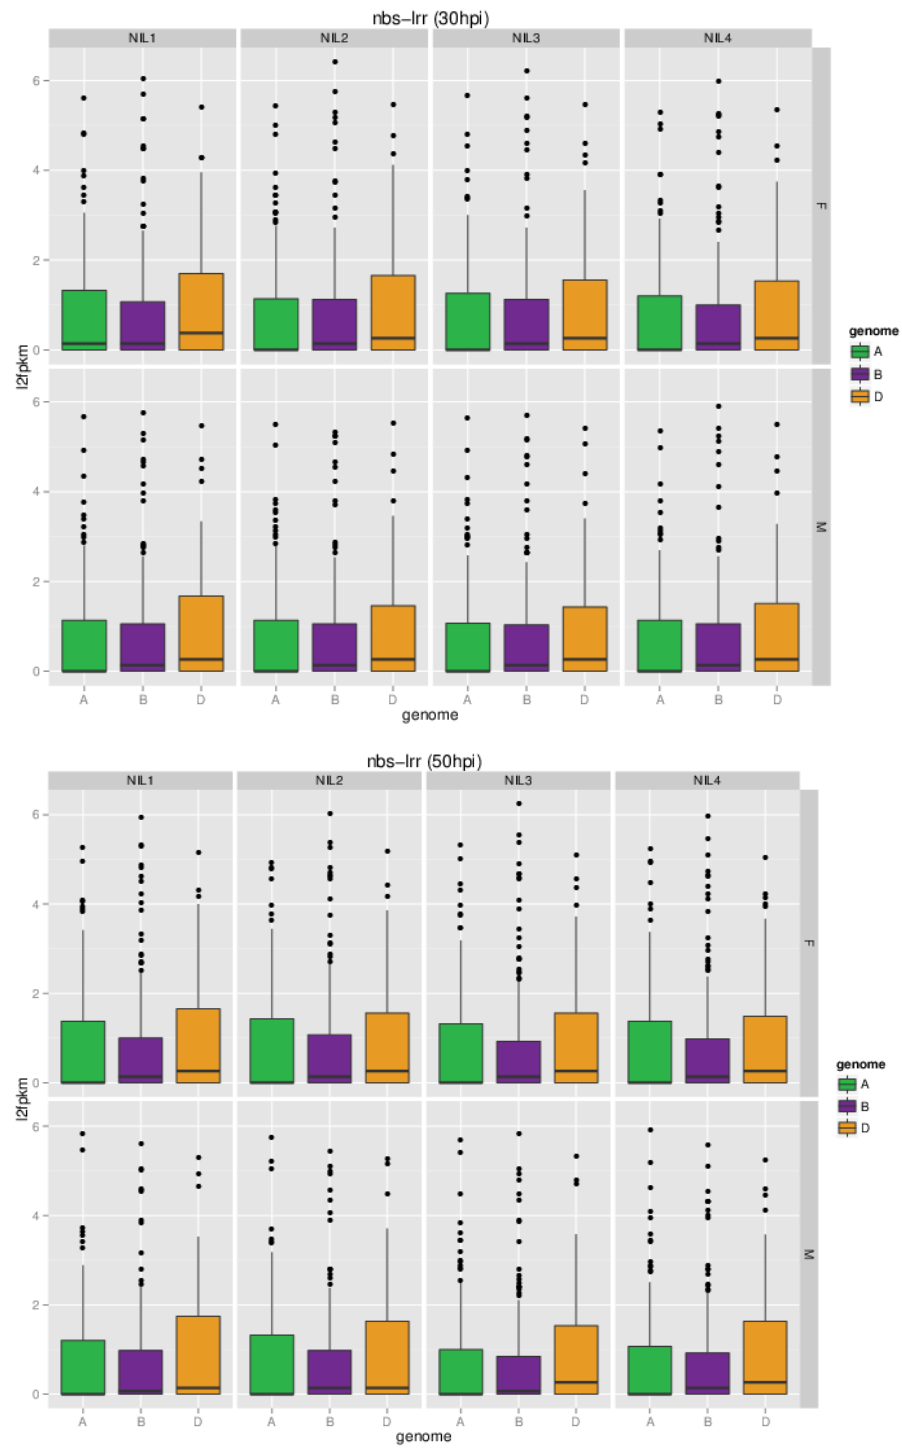

**Supplemental Figure 14** - Expression of NBS-LRR genes. Genes were extracted by searching for the term “NBS-LRR” in the IWGSC bread wheat genome annotation AHRD.

A

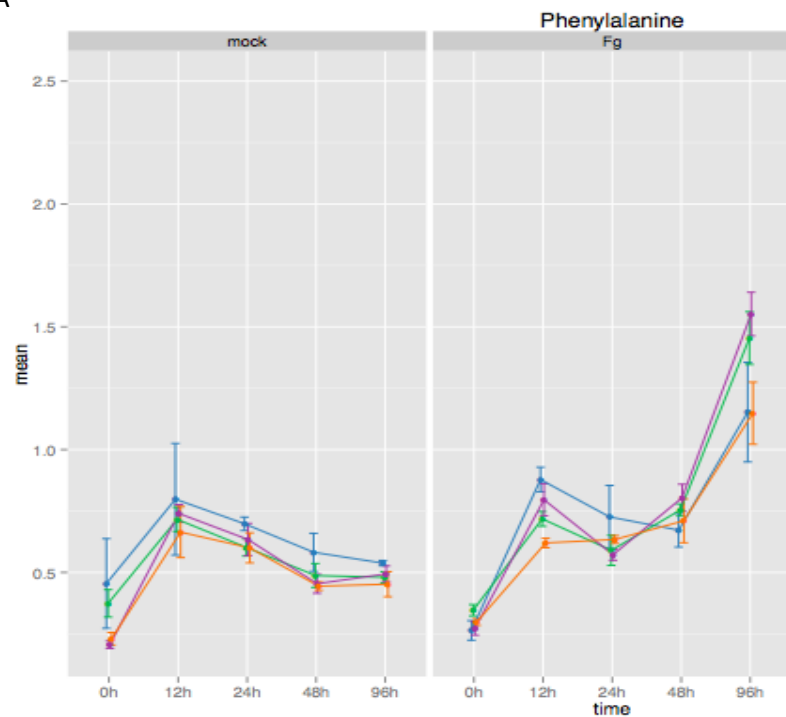

B

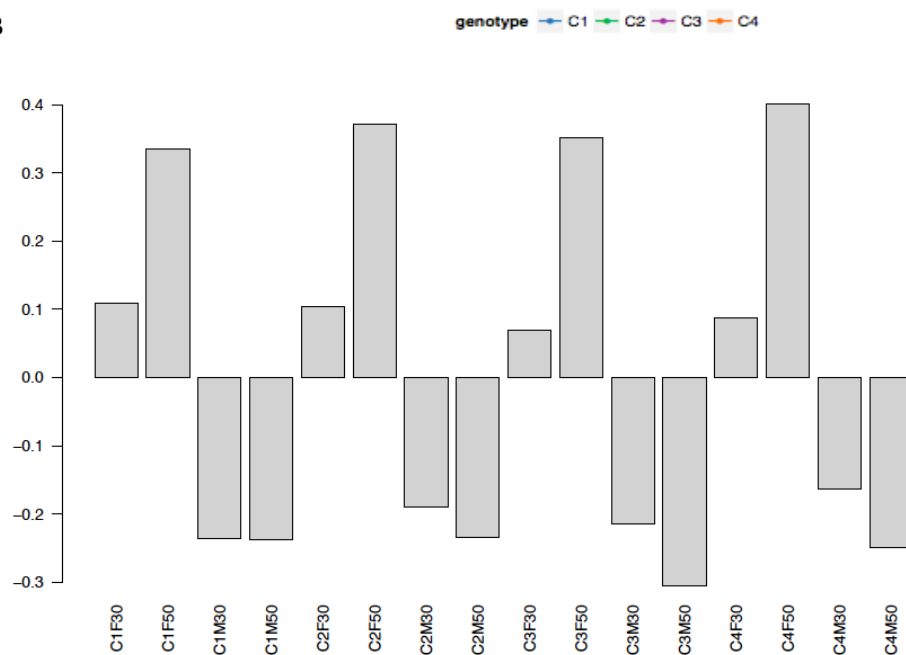

**Supplemental Figure 15** - A: Time course relative abundances for phenylalanine. Left panel corresponds to mock treated samples, right corresponds to *Fusarium graminearum* treated samples., C1-C4 = NIL1-NIL4. B: Eigengene representation of the phenylalanine biosynthesis gene encoding prephenate dehydratase. C1-C4 = NIL1-4. M= mock, F= *Fusarium*, 30, 50 = 30 and 50 hai.
